# Supplementary figures and images for: Deletion of Calsyntenin-3, an atypical cadherin, suppresses inhibitory synapses but increases excitatory parallel-fiber synapses in cerebellum
Source: eLife journal article supplement (doi:10.7554/elife.70664), 2022-04-14

# A

## *mIPSCs*

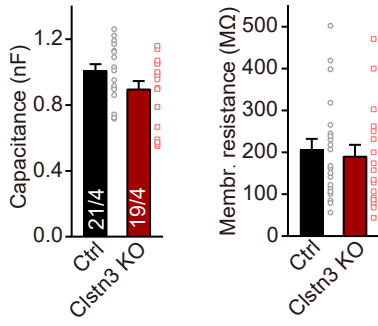

# B

## *IPSCs*

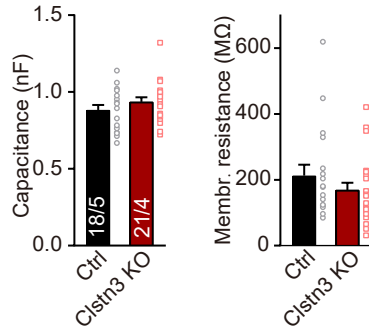

# C

## *mEPSCs*

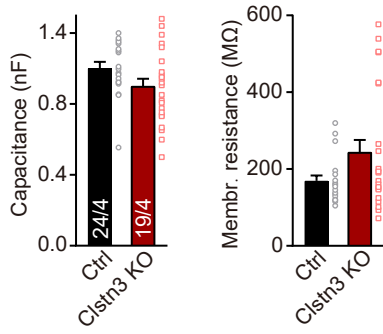

# D

## *CF-PC EPSCs*

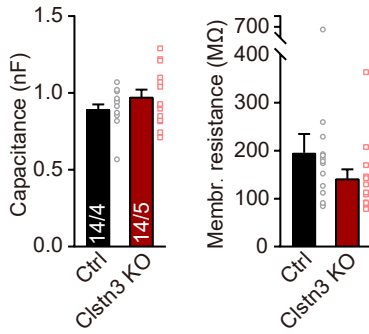

# E

## *PF-PC EPSCs*

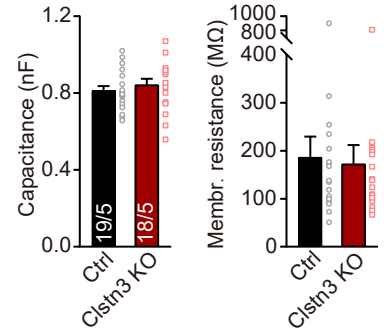

Supplement: supp [file elife-70664-supp-v1.zip]

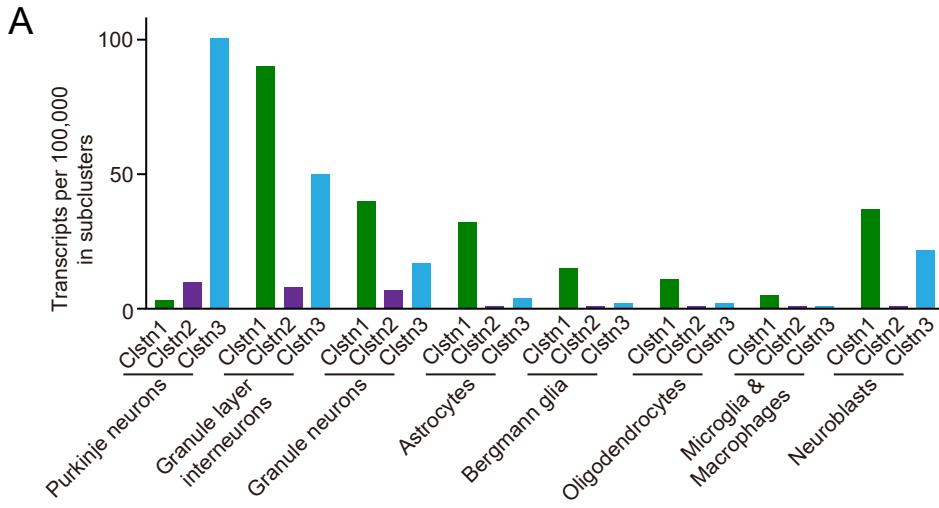

## Standard curve for single cell qRT-PCR

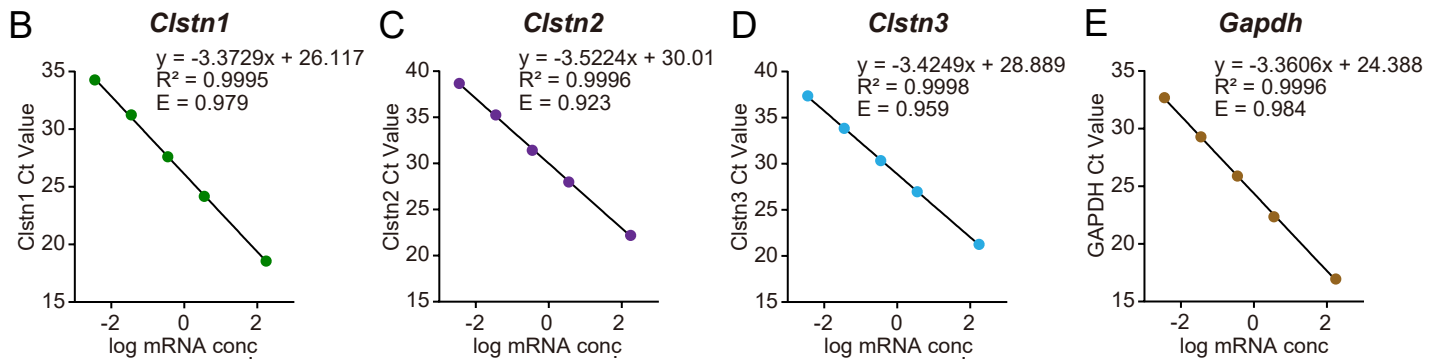

Supplement: supp [file elife-70664-supp-v1.zip]

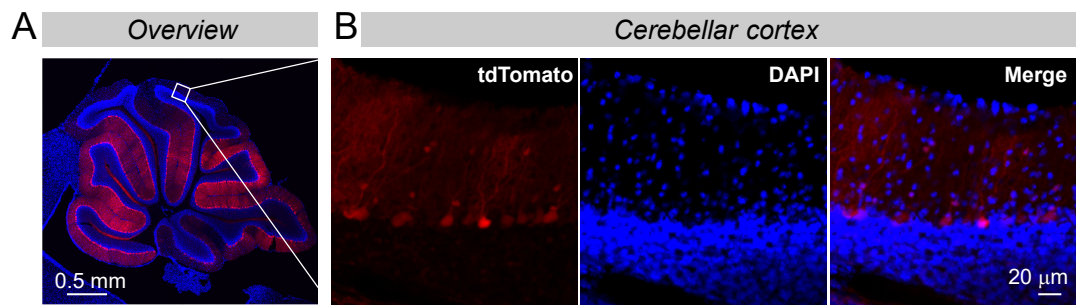

Supplement: supp [file elife-70664-supp-v1.zip]

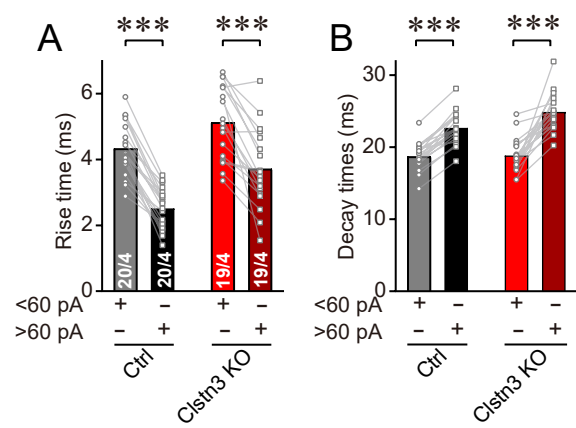

Supplement: supp [file elife-70664-supp-v1.zip]

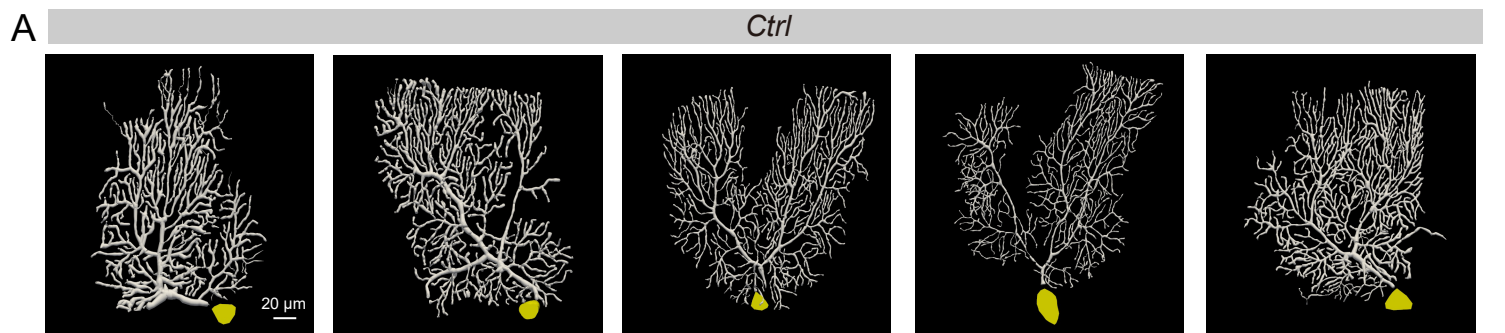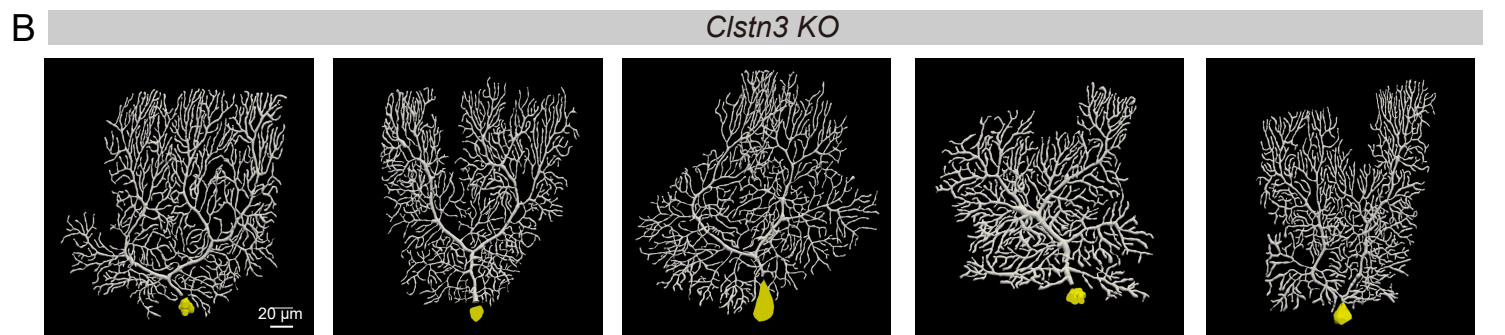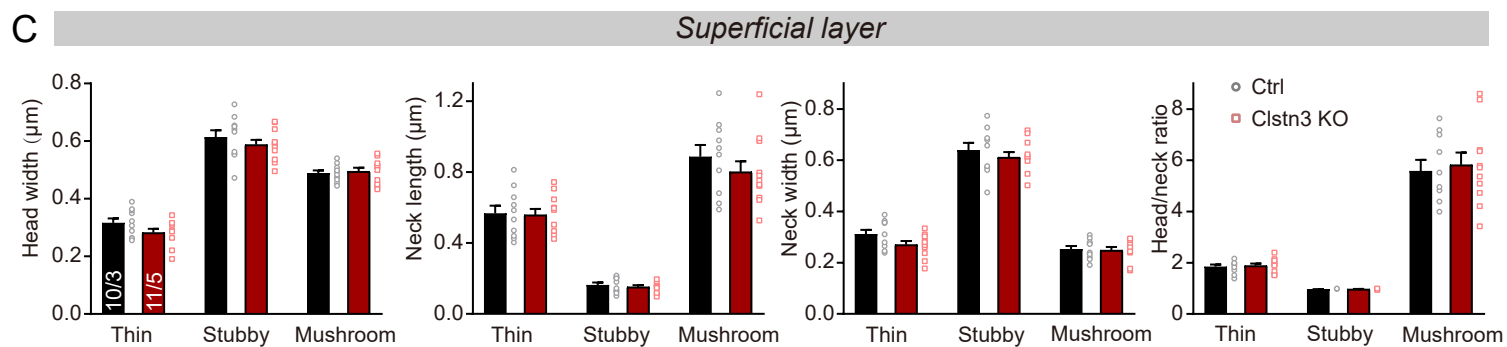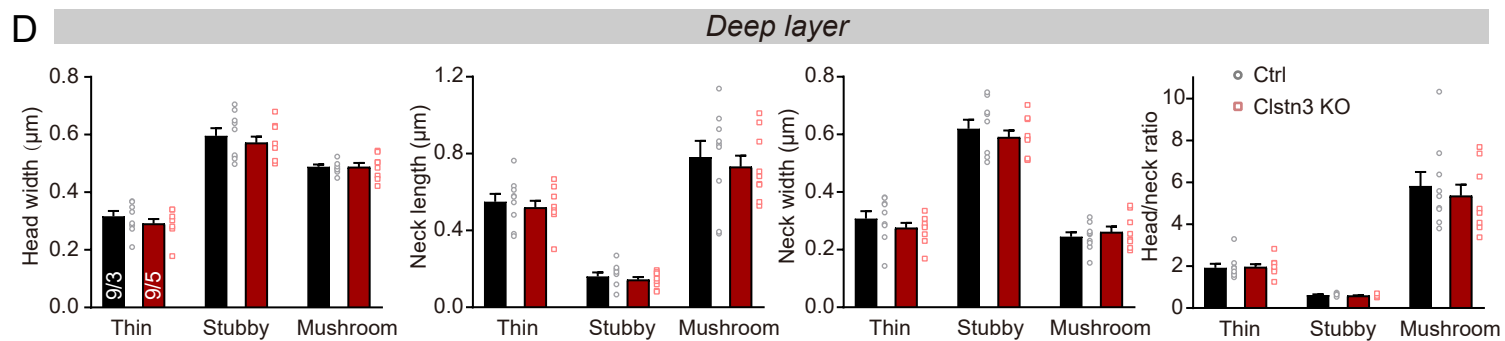

Supplement: supp [file elife-70664-supp-v1.zip]

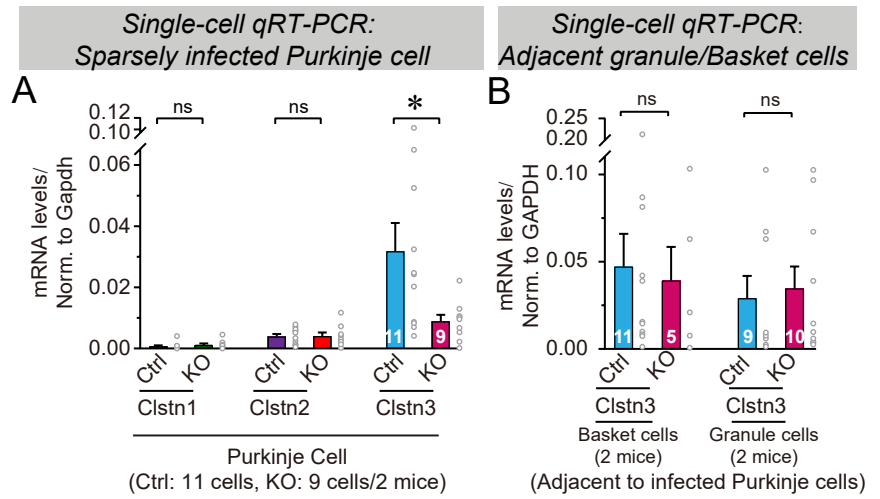

Supplement: supp [file elife-70664-supp-v1.zip]
